# Supplementary material for: Circulating Isolates of <em>Neisseria mucosa</em> do not Inhibit the Growth of <em>Neisseria gonorrhoeae</em>
Source: Preprints.org preprint supplement (doi:10.20944/preprints202108.0468.v1), 2021-08-24
Supplement: Supplementary file 1 [file supplementary]

## Sheet: Sheet 1
									MIC (µg/ml)					Target strains zone of inhibition (mm)
Study	studynr	VISITCODE	visitDate	Sample.ID	isolatenr	Sample.IDX	Species	Remarque	azithromycin	ceftriaxone	ciprofloxacin	Year of collection	Site of collection	WHO F	WHO W	WHO X	ATCC 49226	MoNG 003	MoNG 004	18.527	18.530	18.531	19.572	RL1	RL3	RL7	RL8	07. 110	07. 177	21. 162	21. 163	21. 164	21. 165	21. 166	21. 167	21. 168	21. 169	21. 186	21. 189	21. 191	21. 192
							Other nonpathogenic Neisseria species
Prego	33	M0	2019-04-03	19040471	1	19040471/1	Neisseria meningitidis		0.38	<0,016	0.003	2019	Pharynx	-	-			-
prego	33	M0	2019-04-03	19040471	2	19040471/2	Neisseria meningitidis		0.38	<0,016	0.003
prego	34	M0	2019-04-08	19040855	1	19040855/1	Neisseria meningitidis		0.25	<0,016	0.004
prego	34	M0	2019-04-08	19040855	2	19040855/2	Neisseria meningitidis		0.25	<0,016	0.004
prego	35	M0	2019-04-08	19040874	1	19040874/1	Neisseria sp.	most likely: N. subflava	6	0.047	0.008
Prego	35	M0	2019-04-08	19040874	2	19040874/2	Neisseria meningitidis		2	0.016	0.004	2019	Pharynx	-	-			-
Prego	36	M0	2019-04-08	19040900	1	19040900/1	Neisseria subflava/ flavescens/perflava		>256	0.094	0.38	2019	Pharynx	-	-			-
prego	36	M0	2019-04-08	19040900	2	19040900/2	Neisseria meningitidis		0.75	0.023	0.004
prego	38	M0	2019-04-10	19041324	1	19041324/1	Streptococcus salivarius		8	0.125	1
prego	38	M0	2019-04-10	19041324	2	19041324/2	Neisseria subflava/ flavescens/perflava		4	0.032	0.008
prego	2	M0	2019-04-15	19041762	1	19041762/1	Neisseria subflava/ flavescens/perflava		>256	0.016	1.5
prego	2	M0	2019-04-15	19041762	1.1	19041762/1.1	Neisseria subflava/ flavescens/perflava		>256	0.023	3
prego	3	M0	2019-04-15	19041780	1	19041780/1	Neisseria subflava/ flavescens/perflava		>256	0.064	0.25
prego	4	M0	2019-04-17	19042150	1	19042150/1	Neisseria subflava/ flavescens/perflava		64	0.5	0.25
prego	4	M0	2019-04-17	19042150	2	19042150/2	Neisseria meningitidis		1.5	<0,016	2E-3
prego	4	M0	2019-04-17	19042150	3	19042150/3	Neisseria subflava/ flavescens/perflava		>256	0.047	0.032
prego	5	M0	2019-04-24	19042756	1	19042756/1	Neisseria subflava/ flavescens/perflava		>256	0.023	1
prego	5	M0	2019-04-24	19042756	2	19042756/2	Neisseria subflava/ flavescens/perflava		>256	0.023	0.75
prego	5	M0	2019-04-24	19042756	2.2	19042756/2.2	Neisseria subflava/ flavescens/perflava		>256	0.023	1
prego	5	M0	2019-04-24	19042756	3	19042756/3	Neisseria meningitidis		0.38	<0,016	0.008
prego	6	M0	2019-04-29	19043201	1	19043201/1	Neisseria meningitidis		0.75	<0,016	0.003
prego	6	M0	2019-04-29	19043201	1.1	19043201/1.1	Neisseria subflava/ flavescens/perflava		96	0.047	0.25
prego	6	M0	2019-04-29	19043201	2	19043201/2	Neisseria meningitidis		0.38	<0,016	0.003
prego	6	M0	2019-04-29	19043201	2.1	19043201/2.1	Neisseria subflava/ flavescens/perflava		>256	1	0.38
prego	6	M0	2019-04-29	19043201	3	19043201/3	Neisseria subflava/ flavescens/perflava		96	0.064	0.25
prego	39	M0	2019-04-29	19043274	1	19043274/1	Neisseria meningitidis		0.5	<0,016	0.004
prego	39	M0	2019-04-29	19043274	2	19043274/2	Neisseria meningitidis		0.38	0.016	0.004
prego	39	M0	2019-04-29	19043274	3	19043274/3	Neisseria subflava/ flavescens/perflava		128	0.064	0.25
prego	40	M0	2019-05-06	19050474	1	19050474/1	Neisseria subflava/ flavescens/perflava		8	0.047	0.25
prego	9	M0	2019-05-06	19050514	1	19050514/1	Neisseria subflava/ flavescens/perflava		>256	0.047	0.5
prego	9	M0	2019-05-06	19050514	2	19050514/2	Streptococcus salivarius		8	0.064	1
prego	41	M0	2019-05-08	19050949	1	19050949/1	Neisseria subflava/ flavescens/perflava		3	0.032	0.016
prego	41	M0	2019-05-08	19050949	1.1	19050949/1.1	Moraxella catarrhalis		0.125	0.032	0.023
prego	41	M0	2019-05-08	19050949	2	19050949/2	Neisseria subflava/ flavescens/perflava		4	0.023	0.38
prego	41	M0	2019-05-08	19050949	2.1	19050949/2.1	Neisseria subflava/ flavescens/perflava		4	0.016	0.38
prego	41	M0	2019-05-08	19050949	3	19050949/3	Moraxella catarrhalis		0.125	0.047	0.023
prego	41	M0	2019-05-08	19050949	4	19050949/4	Moraxella catarrhalis		0.125	0.047	0.023
prego	42	M0	2019-05-15	19051853	1	19051853/1	Neisseria meningitidis		0.38	<0,016	0.004
prego	42	M0	2019-05-15	19051853	2	19051853/2	Neisseria meningitidis		0.38	<0,016	0.004
prego	12	M0	2019-05-15	19051904	1	19051904/1	Neisseria sp.	most likely: N. mucosa	2	0.047	0.25
Prego	12	M0	2019-05-15	19051904	2	19051904/2	Neisseria subflava/ flavescens/perflava		2	0.064	0.38	2019	Pharynx	-	-			-
prego	12	M0	2019-05-15	19051904	3	19051904/3	Neisseria subflava/ flavescens/perflava		1.5	0.064	0.38
prego	13	M0	2019-05-20	19052394	1	19052394/1	Neisseria subflava/ flavescens/perflava		2	0.032	0.19
prego	13	M0	2019-05-20	19052394	1.1	19052394/1.1	Neisseria subflava/ flavescens/perflava		1.5	0.023	0.19
prego	13	M0	2019-05-20	19052394	2	19052394/2	Neisseria sp.	unconclusive species identification	4	0.032	0.012
prego	13	M0	2019-05-20	19052394	3	19052394/3	Neisseria meningitidis		0.5	<0,016	2E-3
prego	13	M0	2019-05-20	19052394	3.1	19052394/3.1	Moraxella catarrhalis		0.125	0.032	0.032
prego	43	M0	2019-05-20	19052419	1	19052419/1	Moraxella catarrhalis		0.19	0.032	0.032
prego	43	M0	2019-05-20	19052419	1.1	19052419/1.1	Moraxella catarrhalis		1.5	0.023	0.008
prego	43	M0	2019-05-20	19052419	2	19052419/2	Moraxella catarrhalis		0.125	0.032	0.032
prego	43	M0	2019-05-20	19052419	3	19052419/3	Moraxella catarrhalis		0.094	0.032	0.032
prego	14	M0	2019-05-20	19052434	1	19052434/1	Neisseria meningitidis		0.75	<0,016	0.006
prego	14	M0	2019-05-20	19052434	2	19052434/2	Neisseria meningitidis		0.75	<0,016	0.006
prego	15	M0	2019-05-20	19052460	1	19052460/1	Kingella denitrificans		0.75	0.047	0.25
prego	15	M0	2019-05-20	19052460	2	19052460/2	Kingella denitrificans		4	0.047	0.75
prego	16	M0	2019-05-20	19052488	1	19052488/1	Moraxella catarrhalis		0.125	0.023	0.023
prego	16	M0	2019-05-20	19052488	2	19052488/2	Moraxella catarrhalis		0.094	0.032	0.032
prego	18	M0	2019-06-03	19060069	1	19060069/1	Neisseria meningitidis		1	0.064	0.006
prego	18	M0	2019-06-03	19060069	2	19060069/2	Neisseria meningitidis		1	0.064	0.004
prego	19	M0	2019-06-03	19060089	1	19060089/1	Neisseria subflava/ flavescens/perflava		8	0.047	0.38
prego	19	M0	2019-06-03	19060089	2	19060089/2	Neisseria meningitidis		4	<0,016	2E-3
prego	20	M0	2019-06-17	19061628	1	19061628/1	Streptococcus parasanguinis		12	0.032	0.75
prego	20	M0	2019-06-17	19061628	2	19061628/2	Streptococcus sp.	most likely: S. salivarius	8	0.5	0.75
prego	21	M0	2019-06-17	19061660	1	19061660/1	Streptococcus salivarius/vestibularis		>256	0.047	0.75
prego	22	M0	2019-06-17	19061666	1	19061666/1	Neisseria sp.	most likely: N. meningitidis	3	1	0.064
prego	23	M0	2019-06-17	19061680	1	19061680/1	Streptococcus salivarius/vestibularis		0.5	0.032	1
prego	23	M0	2019-06-17	19061680	2	19061680/2	Streptococcus salivarius/vestibularis		0.38	0.032	1
prego	25	M0	2019-06-26	19062968	1	19062968/1	Neisseria sp.	most likely: N. macacae	16	0.064	6
prego	26	M0	2019-06-26	19062990	1	19062990/1	Neisseria meningitidis		0.5	<0,016	0.004
prego	26	M0	2019-06-26	19062990	2	19062990/2	Neisseria meningitidis		0.5	<0,016	0.004
prego	26	M0	2019-06-26	19062990	3	19062990/3	Neisseria meningitidis		0.5	<0,016	0.004
prego	26	M0	2019-06-26	19062990	4	19062990/4	Streptococcus dysgalactiae / canis		96	0.032	0.38
prego	27	M0	2019-06-26	19062994	1	19062994/1	Neisseria subflava/ flavescens/perflava		2	0.047	0.016
prego	27	M0	2019-06-26	19062994	1.1	19062994/1.1	Neisseria subflava/ flavescens/perflava		4	0.125	0.008
prego	48	M0	2019-06-26	19063007	1	19063007/1	Neisseria subflava/ flavescens/perflava		24	0.19	0.75
prego	48	M0	2019-06-26	19063007	1.1	19063007/1.1	Neisseria subflava/ flavescens/perflava		24	0.125	0.5
prego	28	M0	2019-07-01	19070015	1	19070015/1	Neisseria subflava/ flavescens/perflava		3	0.094	0.125
prego	28	M0	2019-07-01	19070015	1.1	19070015/1.1	Neisseria subflava/ flavescens/perflava		4	0.064	0.125
prego	49	M0	2019-07-01	19070019	1	19070019/1	Neisseria subflava/ flavescens/perflava		2	0.047	0.016
prego	49	M0	2019-07-01	19070019	2	19070019/2	Neisseria meningitidis		0.38	0.047	0.003
prego	49	M0	2019-07-01	19070019	3	19070019/3	Neisseria subflava/ flavescens/perflava		2	0.064	0.023
prego	49	M0	2019-07-01	19070019	4	19070019/4	Neisseria meningitidis		0.38	0.064	0.003
prego	49	M0	2019-07-01	19070019	5	19070019/5	Neisseria meningitidis		0.38	0.047	0.003
prego	50	M0	2019-07-01	19070047	1	19070047/1	Neisseria meningitidis		0.5	<0,016	0.006
prego	50	M0	2019-07-01	19070047	2	19070047/2	Neisseria meningitidis		0.5	<0,016	0.006
prego	30	M0	2019-07-03	19070471	1	19070471/1	Neisseria subflava/ flavescens/perflava		>256	0.064	1
prego	51	M0	2019-07-08	19070909	1	19070909/1	Neisseria subflava/ flavescens/perflava		48	0.023	0.125
prego	51	M0	2019-07-08	19070909	2	19070909/2	Neisseria subflava/ flavescens/perflava		Geen groei op GC	Geen groei op GC	Geen groei op GC
prego	51	M0	2019-07-08	19070909	2.1	19070909/2.1	Neisseria subflava/ flavescens/perflava		Geen groei op GC	Geen groei op GC	Geen groei op GC
prego	32	M0	2019-07-17	19072168	1	19072168/1	Neisseria subflava/ flavescens/perflava		>256	0.032	0.5
prego	52	M0	2019-08-14	19081774	1	19081774/1	Neisseria subflava/ flavescens/perflava		>256	0.75	0.38
prego	52	M0	2019-08-14	19081774	2	19081774/2	Neisseria sp.	unconclusive species identification	24	0.094	0.016
prego	53	M0	2019-08-21	19082621	1	19082621/1	Neisseria subflava/ flavescens/perflava		4	0.5	0.032
prego	53	M0	2019-08-21	19082621	2	19082621/2	Neisseria meningitidis		0.5	<0,016	0.004
prego	53	M0	2019-08-21	19082621	3	19082621/3	Neisseria meningitidis		0.5	<0,016	0.004
prego	53	M0	2019-08-21	19082621	4	19082621/4	Neisseria subflava/ flavescens/perflava		4	0.19	0.023
prego	54	M0	2019-09-11	19091461	1	19091461/1	Neisseria sp.	most likely: N. meningitidis	6	<0,016	0.008
prego	54	M0	2019-09-11	19091461	2	19091461/2	Neisseria meningitidis		4	<0,016	0.008
prego	55	M0	2019-09-11	19091480	1	19091480/1	Neisseria subflava/ flavescens/perflava		>256	0.5	0.5
prego	56	M0	2019-09-16	19091973	1	19091973/1	Neisseria meningitidis		0.5	<0,016	0.003
prego	56	M0	2019-09-16	19091973	2	19091973/2	Neisseria subflava/ flavescens/perflava		4	0.094	0.38
prego	57	M0	2019-09-18	19092429	1	19092429/1	Neisseria subflava/ flavescens/perflava		2	0.032	0.008
prego	57	M0	2019-09-18	19092429	1.1	19092429/1.1	Neisseria subflava/ flavescens/perflava		0.125	0.023	0.032
prego	57	M0	2019-09-18	19092429	2	19092429/2	Neisseria subflava/ flavescens/perflava		4	0.047	0.5
prego	57	M0	2019-09-18	19092429	3	19092429/3	Neisseria meningitidis		0.38	<0,016	0.003
prego	57	M0	2019-09-18	19092429	4	19092429/4	Neisseria subflava/ flavescens/perflava		4	0.047	0.5
prego	59	M0	2019-10-28	19103457	1	19103457/1	Neisseria meningitidis		0.38	<0,016	0.003
prego	59	M0	2019-10-28	19103457	2	19103457/2	Neisseria subflava/ flavescens/perflava		>256	0.5	0.75
prego	59	M0	2019-10-28	19103457	3	19103457/3	Neisseria subflava/ flavescens/perflava		1.5	0.047	0.012
prego	59	M0	2019-10-28	19103457	4	19103457/4	Neisseria meningitidis		0.25	<0,016	0.003
prego	60	M0	2019-11-06	19110394	1	19110394/1	Neisseria meningitidis		0.5	<0,016	0.003
prego	60	M0	2019-11-06	19110394	2	19110394/2	Neisseria subflava/ flavescens/perflava		4	0.016	0.016
prego	60	M0	2019-11-06	19110394	3	19110394/3	Neisseria meningitidis		0.5	<0,016	0.003
prego	60	M0	2019-11-06	19110394	4	19110394/4	Neisseria subflava/ flavescens/perflava		3	0.023	0.016
prego	61	M0	2019-11-15	19111422	1	19111422/1	Neisseria subflava/ flavescens/perflava		1.5	0.032	0.125
prego	61	M0	2019-11-15	19111422	2	19111422/2	Streptococcus salivarius/vestibularis		12	0.047	1
prego	61	M0	2019-11-15	19111422	3	19111422/3	Streptococcus parasanguinis		0.125	<0,016	0.75
prego	61	M0	2019-11-15	19111422	4	19111422/4	Neisseria sp.	most likely: N. macacae	1.5	0.032	0.016
prego	61	M0	2019-11-15	19111422	5	19111422/5	Neisseria subflava/ flavescens/perflava		1	0.032	0.125
Prego	61	M0	2019-11-15	19111422	7	19111422/7	Neisseria sp.	most likely: N. macacae	1	0.032	0.016	2019	Pharynx	-	-			-
prego	62	M0	2019-11-15	19111441	1	19111441/1	Neisseria subflava/ flavescens/perflava		3	0.023	0.023
prego	62	M0	2019-11-15	19111441	2	19111441/2	Streptococcus anginosus group		0.125	0.125	0.75
prego	63	M0	2019-11-28	19113049	1	19113049/1	Streptococcus dysgalactiae / canis		>256	0.023	0.25
prego	63	M0	2019-11-28	19113049	2	19113049/2	Moraxella catarrhalis		0.125	1.5	0.023
prego	63	M0	2019-11-28	19113049	3	19113049/3	Neisseria meningitidis		0.19	<0,016	0.004
prego	63	M0	2019-11-28	19113049	4	19113049/4	Moraxella catarrhalis		0.19	1	0.023
prego	63	M0	2019-11-28	19113049	5	19113049/5	Streptococcus dysgalactiae / canis		>256	0.023	0.38
prego	63	M0	2019-11-28	19113049	6	19113049/6	Neisseria meningitidis		0.25	<0,016	0.003
prego	64	M0	2019-11-28	19113052	1	19113052/1	Neisseria subflava/ flavescens/perflava		1	0.023	0.016
prego	64	M0	2019-11-28	19113052	2	19113052/2	Moraxella catarrhalis		0.094	0.023	0.023
comcom	1		2020-06-15	Co000759	1	Co000759/1	Neisseria subflava/ flavescens/perflava		3	0.023	0.006
comcom	1		2020-06-15	Co000759	2	Co000759/2	Neisseria subflava/ flavescens/perflava		4	0.047	0.008
comcom	2		2020-06-15	Co000760	1	Co000760/1	Neisseria subflava/ flavescens/perflava		1.5	0.023	0.012
comcom	2		2020-06-15	Co000760	2	Co000760/2	Neisseria subflava/ flavescens/perflava		3	0.125	0.047
comcom	2		2020-06-15	Co000760	3	Co000760/3	Neisseria sp.	most likely: N. subflava	3	0.023	0.008
comcom	2		2020-06-15	Co000760	4	Co000760/4	Neisseria subflava/ flavescens/perflava		2	0.023	0.016
Comcom	3		2020-06-15	Co000761	1	Co000761/1	Neisseria lactamica		2	<0,016	0.19	2020	Pharynx	-	-			-
comcom	3		2020-06-15	Co000761	2	Co000761/2	Neisseria subflava/ flavescens/perflava		2	0.023	0.012
comcom	3		2020-06-15	Co000761	3	Co000761/3	Neisseria subflava/ flavescens/perflava		4	0.032	0.75
comcom	3		2020-06-15	Co000761	4	Co000761/4	Moraxella catarrhalis		Geen groei op GC	Geen groei op GC	Geen groei op GC
comcom	3		2020-06-15	Co000761	5	Co000761/5	Neisseria subflava/ flavescens/perflava		6	0.016	0.38
comcom	3		2020-06-15	Co000761	6	Co000761/6	Neisseria subflava/ flavescens/perflava		3	0.016	0.008
Comcom	3		2020-06-15	Co000761	7	Co000761/7	Neisseria oralis		2	0.064	0.016	2020	Pharynx	-	-			-
comcom	4		2020-06-22	Co000762	1	Co000762/1	Paenochrobactrum sp.		4	0.047	0.38
comcom	4		2020-06-22	Co000762	2	Co000762/2	Paenochrobactrum sp.		2	0.064	0.38
comcom	4		2020-06-22	Co000762	3	Co000762/3	Neisseria subflava/ flavescens/perflava		6	0.094	0.016
comcom	4		2020-06-22	Co000762	4	Co000762/4	Neisseria subflava/ flavescens/perflava		4	0.094	0.016
Comcom	5		2020-06-22	Co000763	1	Co000763/1	Neisseria oralis		1	0.032	0.012	2020	Pharynx	-	-			-
comcom	5		2020-06-22	Co000763	2	Co000763/2	Neisseria subflava/ flavescens/perflava		2	0.032	0.008
comcom	6		2020-06-22	Co000764	1	Co000764/1	Neisseria subflava/ flavescens/perflava		8	0.032	0.032
comcom	6		2020-06-22	Co000764	2	Co000764/2	Neisseria subflava/ flavescens/perflava		8	0.023	0.047
comcom	6		2020-06-22	Co000764	3	Co000764/3	Neisseria subflava/ flavescens/perflava		8	0.032	0.032
Comcom	7		2020-06-22	Co000765	1	Co000765/1	Neisseria meningitidis		0.5	<0,016	0.004	2020	Pharynx	-	-			-
comcom	7		2020-06-22	Co000765	2	Co000765/2	Neisseria subflava/ flavescens/perflava		3	0.047	0.023
comcom	7		2020-06-22	Co000765	3	Co000765/3	Neisseria subflava/ flavescens/perflava		3	0.032	0.016
comcom	7		2020-06-22	Co000765	4	Co000765/4	Neisseria subflava/ flavescens/perflava		3	0.023	0.012
comcom	7		2020-06-22	Co000765	5	Co000765/5	Neisseria meningitidis		0.5	<0,016	0.004
comcom	8		2020-06-22	Co000766	1	Co000766/1	Neisseria subflava/ flavescens/perflava		6	0.023	0.047
comcom	8		2020-06-22	Co000766	2	Co000766/2	Neisseria oralis		1.5	0.023	0.023
comcom	8		2020-06-22	Co000766	3	Co000766/3	Neisseria subflava/ flavescens/perflava		1	0.032	0.008
comcom	8		2020-06-22	Co000766	4	Co000766/4	Actinomyces odontolyticus		herhalen	herhalen	herhalen
comcom	8		2020-06-22	Co000766	5	Co000766/5	Chryseobacterium sp.		herhalen	herhalen	herhalen
comcom	9		2020-06-22	Co000767	1	Co000767/1	Neisseria subflava/ flavescens/perflava		1	0.023	0.008
comcom	9		2020-06-22	Co000767	2	Co000767/2	Neisseria subflava/ flavescens/perflava		6	0.023	1
Comcom	9		2020-06-22	Co000767	3	Co000767/3	Neisseria elongata		0.5	0.19	0.004	2020	Pharynx	-	-			-
comcom	9		2020-06-22	Co000767	4	Co000767/4	Neisseria subflava/ flavescens/perflava		1.5	0.023	0.016
comcom	9		2020-06-22	Co000767	5	Co000767/5	Neisseria subflava/ flavescens/perflava		1.5	0.064	0.38
comcom	9		2020-06-22	Co000767	6	Co000767/6	Neisseria subflava/ flavescens/perflava		0.75	0.023	0.006
comcom	9		2020-06-22	Co000767	7	Co000767/7	Neisseria subflava/ flavescens/perflava		1.5	0.047	0.38
comcom	10		2020-06-22	Co000768	1	Co000768/1	Neisseria subflava/ flavescens/perflava		2	0.023	0.006
comcom	10		2020-06-22	Co000768	2	Co000768/2	Neisseria subflava/ flavescens/perflava		3	0.023	0.008
comcom	11		2020-06-22	Co000769	1	Co000769/1	Neisseria subflava/ flavescens/perflava		4	0.047	0.5
comcom	11		2020-06-22	Co000769	2	Co000769/2	Neisseria subflava/ flavescens/perflava		2	0.023	0.008
Comcom	11		2020-06-22	Co000769	3	Co000769/3	Neisseria cinerea		1	<0,016	0.006	2020	Pharynx	-	-			-
comcom	11		2020-06-22	Co000769	4	Co000769/4	Neisseria subflava/ flavescens/perflava		4	0.064	0.5
comcom	11		2020-06-22	Co000769	5	Co000769/5	Neisseria subflava/ flavescens/perflava		4	0.064	0.5
comcom	12		2020-06-22	Co000770	1	Co000770/1	Neisseria oralis		2	0.064	0.016
comcom	12		2020-06-22	Co000770	2	Co000770/2	Neisseria subflava/ flavescens/perflava		2	0.032	0.25
comcom	12		2020-06-22	Co000770	3	Co000770/3	Streptococcus salivarius/vestibularis		0.5	0.25	2
comcom	12		2020-06-22	Co000770	4	Co000770/4	Neisseria subflava/ flavescens/perflava		4	0.032	0.5
comcom	12		2020-06-22	Co000770	5	Co000770/5	Neisseria sp.	control running	3	0.047	0.023
comcom	12		2020-06-22	Co000770	6	Co000770/6	Neisseria subflava/ flavescens/perflava		3	0.032	0.047
Comcom	13		2020-06-22	Co000771	1	Co000771/1	Neisseria lactamica		1	<0,016	0.064	2020	Pharynx	-	-			-
comcom	13		2020-06-22	Co000771	2	Co000771/2	Neisseria subflava/ flavescens/perflava		6	0.064	1
comcom	13		2020-06-22	Co000771	3	Co000771/3	Neisseria subflava/ flavescens/perflava		6	0.016	0.006
comcom	13		2020-06-22	Co000771	5	Co000771/5	Neisseria subflava/ flavescens/perflava		3	0.064	0.016
comcom	14		2020-06-22	Co000772	1	Co000772/1	Neisseria subflava/ flavescens/perflava		2	0.064	0.023
comcom	14		2020-06-22	Co000772	2	Co000772/2	Neisseria subflava/ flavescens/perflava		3	0.064	0.016
comcom	14		2020-06-22	Co000772	3	Co000772/3	Neisseria sp.	control running	4	0.032	0.006
comcom	14		2020-06-22	Co000772	4	Co000772/4	Neisseria subflava/ flavescens/perflava		4	0.023	0.016
comcom	14		2020-06-22	Co000772	5	Co000772/5	Neisseria subflava/ flavescens/perflava		3	0.023	0.012
comcom	14		2020-06-22	Co000772	6	Co000772/6	Neisseria subflava/ flavescens/perflava		4	0.016	0.008
comcom	15		2020-06-22	Co000773	1	Co000773/1	Neisseria subflava/ flavescens/perflava		2	0.064	0.38
comcom	15		2020-06-22	Co000773	2	Co000773/2	Neisseria subflava/ flavescens/perflava		3	0.064	0.38
comcom	16		2020-06-22	Co000774	1	Co000774/1	Neisseria oralis		3	0.032	0.023
comcom	16		2020-06-22	Co000774	2	Co000774/2	Neisseria subflava/ flavescens/perflava		3	0.016	0.047
comcom	16		2020-06-22	Co000774	3	Co000774/3	Neisseria subflava/ flavescens/perflava		3	0.016	0.047
comcom	17		2020-06-22	Co000775	1	Co000775/1	Neisseria subflava/ flavescens/perflava		2	0.032	1
comcom	17		2020-06-22	Co000775	2	Co000775/2	Neisseria subflava/ flavescens/perflava		4	0.047	0.016
comcom	17		2020-06-22	Co000775	3	Co000775/3	Neisseria subflava/ flavescens/perflava		0.094	0.094	0.25
Comcom	18		2020-06-22	Co000776	1	Co000776/1	Neisseria oralis		4	0.047	0.016	2020	Pharynx	-	-			-
comcom	18		2020-06-22	Co000776	1.1	Co000776/1.1	Neisseria oralis		3	0.047	0.012
comcom	18		2020-06-22	Co000776	2	Co000776/2	Neisseria subflava/ flavescens/perflava		32	0.125	0.047
comcom	18		2020-06-22	Co000776	3	Co000776/3	Neisseria subflava/ flavescens/perflava		24	0.125	0.047
Comcom	18		2020-06-22	Co000776	4	Co000776/4	Neisseria cinerea		24	<0,016	0.032	2020	Pharynx	-	-			-
comcom	18		2020-06-22	Co000776	5	Co000776/5	Neisseria cinerea		32	<0,016	0.032
comcom	19		2020-06-29	Co000777	1	Co000777/1	Neisseria subflava/ flavescens/perflava		2	0.064	1
Comcom	19		2020-06-29	Co000777	2	Co000777/2	Neisseria subflava/ flavescens/perflava		0.25	0.047	0.5	2020	Pharynx	-	-			-
comcom	19		2020-06-29	Co000777	3	Co000777/3	Moraxella nonliquefaciens		0.032	0.032	0.012
Comcom	19		2020-06-29	Co000777	4	Co000777/4	Neisseria subflava/ flavescens/perflava		>256	0.047	2	2020	Pharynx	-	-			-
comcom	20		2020-06-29	Co000778	1	Co000778/1			3	0.094	0.012
comcom	20		2020-06-29	Co000778	2	Co000778/2			2	0.047	>32
comcom	20		2020-06-29	Co000778	3	Co000778/3			4	0.094	0.012
comcom	20		2020-06-29	Co000778	4	Co000778/4			4	0.094	0.012
comcom	21		2020-06-29	Co000779	1	Co000779/1			2	0.125	0.032
comcom	21		2020-06-29	Co000779	2	Co000779/2			4	0.094	0.012
comcom	22		2020-06-29	Co000780	1	Co000780/1			0.75	0.047	0.004
comcom	22		2020-06-29	Co000780	2	Co000780/2			0.75	0.047	0.004
comcom	22		2020-06-29	Co000780	3	Co000780/3			GEEN GROEI OP GC	GEEN GROEI OP GC	GEEN GROEI OP GC
comcom	22		2020-06-29	Co000780	4	Co000780/4			2	0.125	0.75
comcom	22		2020-06-29	Co000780	5	Co000780/5			2	1.5	0.125
comcom	23		2020-06-29	Co000781	1	Co000781/1			1.5	0.094	0.5
comcom	23		2020-06-29	Co000781	2	Co000781/2			1.5	0.094	0.5
comcom	23		2020-06-29	Co000781	3	Co000781/3			4	0.064	2
comcom	23		2020-06-29	Co000781	4	Co000781/4			3	0.094	0.75
comcom	24		2020-06-29	Co000782	1	Co000782/1			2	<0,016	0.012
comcom	24		2020-06-29	Co000782	2	Co000782/2			8	0.047	0.016
comcom	24		2020-06-29	Co000782	3	Co000782/3			8	0.25	0.012
comcom	24		2020-06-29	Co000782	4	Co000782/4			8	0.047	0.023
comcom	25		2020-06-29	Co000783	1	Co000783/1			4	0.125	0.064
comcom	25		2020-06-29	Co000783	2	Co000783/2			1.5	0.032	0.094
comcom	25		2020-06-29	Co000783	3	Co000783/3			6	0.032	0.012
comcom	25		2020-06-29	Co000783	4	Co000783/4			0.38	0.023	0.023
comcom	25		2020-06-29	Co000783	5	Co000783/5			2	0.032	0.012
comcom	25		2020-06-29	Co000783	6	Co000783/6			32	0.032	0.023
comcom	26		2020-06-29	Co000784	1	Co000784/1			1.5	0.023	0.023
comcom	26		2020-06-29	Co000784	2	Co000784/2			4	0.047	0.75
comcom	26		2020-06-29	Co000784	3	Co000784/3			4	0.047	0.75
comcom	26		2020-06-29	Co000784	4	Co000784/4			0.5	<0,016	0.25
comcom	26		2020-06-29	Co000784	5	Co000784/5			4	0.032	0.023
comcom	26		2020-06-29	Co000784	6	Co000784/6			4	0.047	0.75
comcom	27		2020-06-29	Co000785	1	Co000785/1			1	0.047	0.016
comcom	27		2020-06-29	Co000785	2	Co000785/2			1.5	0.047	0.25
comcom	27		2020-06-29	Co000785	3	Co000785/3			2	0.064	0.125
comcom	27		2020-06-29	Co000785	4	Co000785/4			1	0.064	0.012
comcom	28		2020-06-29	Co000786	1	Co000786/1			2	0.032	0.047
comcom	28		2020-06-29	Co000786	2	Co000786/2			4	0.064	0.016
comcom	28		2020-06-29	Co000786	3	Co000786/3			4	0.064	0.016
comcom	28		2020-06-29	Co000786	4	Co000786/4			4	0.064	0.016
comcom	29		2020-06-29	Co000787	1	Co000787/1			2	0.032	>32
comcom	29		2020-06-29	Co000787	2	Co000787/2			6	0.023	0.023
comcom	29		2020-06-29	Co000787	3	Co000787/3			4	0.094	0.064
comcom	29		2020-06-29	Co000787	4	Co000787/4			6	0.016	0.023
comcom	29		2020-06-29	Co000787	5	Co000787/5			6	0.016	0.023
comcom	29		2020-06-29	Co000787	6	Co000787/6			2	0.032	>32
comcom	30		2020-06-29	Co000788	1	Co000788/1			2	0.032	0.012
comcom	30		2020-06-29	Co000788	2	Co000788/2			3	0.047	0.25
comcom	30		2020-06-29	Co000788	3	Co000788/3			3	0.047	0.016
comcom	30		2020-06-29	Co000788	4	Co000788/4			4	0.032	0.012
comcom	30		2020-06-29	Co000788	5	Co000788/5			3	0.016	0.19
comcom	31		2020-06-29	Co000789	1	Co000789/1			6	0.032	0.016
comcom	31		2020-06-29	Co000789	2	Co000789/2			6	0.032	0.016
comcom	31		2020-06-29	Co000789	3	Co000789/3			6	0.032	0.016
comcom	31		2020-06-29	Co000789	4	Co000789/4			6	0.032	0.016
comcom	32		2020-06-29	Co000790	1	Co000790/1			2	<0,016	0.125
comcom	32		2020-06-29	Co000790	2	Co000790/2			1	0.032	0.006
comcom	32		2020-06-29	Co000790	3	Co000790/3			1	<0,016	0.125
comcom	32		2020-06-29	Co000790	4	Co000790/4			1.5	0.047	0.006
comcom	32		2020-06-29	Co000790	5	Co000790/5			2	0.064	0.006
prego	122	M0	2019-05-24	19053248
prego	17	M0	2019-05-27	19053328
prego	1	M0	2019-04-03	19040477
prego	65	M0	2019-04-04	19040527
prego	66	M0	2019-04-04	19040545
prego	67	M0	2019-04-05	19040687
prego	68	M0	2019-04-05	19040744
prego	69	M0	2019-04-05	19040759
prego	123	M0	2019-06-06	19060513
prego	124	M0	2019-06-06	19060527
prego	125	M0	2019-06-06	19060536
prego	126	M0	2019-06-06	19060550
prego	127	M0	2019-06-07	19060695
prego	128	M0	2019-06-07	19060720
prego	37	M0	2019-04-10	19041303
prego	46	M0	2019-06-12	19061129
prego	130	M0	2019-06-13	19061243
prego	70	M0	2019-04-11	19041381
prego	71	M0	2019-04-11	19041399
prego	72	M0	2019-04-11	19041410
prego	73	M0	2019-04-11	19041424
prego	74	M0	2019-04-12	19041558
prego	75	M0	2019-04-12	19041604
prego	76	M0	2019-04-12	19041646
prego	77	M0	2019-04-12	19041663
prego	224	M0	2019-10-07	19100842
prego	180	M0	2019-08-22	19082670
prego	181	M0	2019-08-22	19082686
prego	90	M3	2019-08-22	19082701
prego	98	M3	2019-08-22	19082711
prego	47	M0	2019-06-19	19062075
prego	138	M0	2019-06-20	19062137
prego	78	M0	2019-04-18	19042192
prego	79	M0	2019-04-18	19042211
prego	80	M0	2019-04-18	19042225
prego	81	M0	2019-04-18	19042246
prego	82	M0	2019-04-19	19042361
prego	83	M0	2019-04-19	19042379
prego	84	M0	2019-04-19	19042406
prego	101	M3	2019-08-23	19082927
prego	186	M0	2019-08-23	19082950
prego	120	M3	2019-08-23	19082981
prego	187	M0	2019-08-23	19083031
prego	85	M0	2019-04-25	19042836
prego	86	M0	2019-04-25	19042863
prego	87	M0	2019-04-25	19042876
prego	88	M0	2019-04-26	19043005
prego	144	M0	2019-06-27	19063042
prego	145	M0	2019-06-27	19063059
prego	146	M0	2019-06-27	19063080
prego	147	M0	2019-06-27	19063094
prego	148	M0	2019-06-27	19063105
prego	7	M0	2019-04-29	19043225
prego	8	M0	2019-04-29	19043243
prego	151	M0	2019-06-28	19063311
prego	152	M0	2019-06-28	19063329
prego	153	M0	2019-06-28	19063338
prego	89	M0	2019-05-02	19050014
prego	90	M0	2019-05-02	19050028
prego	91	M0	2019-05-02	19050046
prego	92	M0	2019-05-02	19050098
prego	93	M0	2019-05-03	19050242
prego	94	M0	2019-05-03	19050273
prego	96	M0	2019-05-03	19050295
prego	95	M0	2019-05-03	19050319
prego	97	M0	2019-05-03	19050331
prego	29	M0	2019-07-03	19070455
prego	116	M3	2019-09-05	19090564
prego	38	M3	2019-07-03	19070480
prego	154	M0	2019-07-04	19070528
prego	155	M0	2019-07-04	19070552
prego	156	M0	2019-07-04	19070557
prego	69	M3	2019-07-05	19070744
prego	157	M0	2019-07-05	19070817
prego	158	M0	2019-07-05	19070841
prego	98	M0	2019-05-09	19050984
prego	99	M0	2019-05-09	19051011
prego	100	M0	2019-05-09	19051022
prego	101	M0	2019-05-09	19051030
prego	102	M0	2019-05-10	19051154
prego	103	M0	2019-05-10	19051158
prego	104	M0	2019-05-10	19051276
prego	105	M0	2019-05-10	19051293
prego	10	M0	2019-05-13	19051404
prego	79	M3	2019-07-11	19071422
prego	159	M0	2019-07-11	19071452
prego	11	M0	2019-05-15	19051892
prego	73	M3	2019-07-12	19071572
prego	77	M3	2019-07-12	19071599
prego	75	M3	2019-07-12	19071604
prego	106	M0	2019-05-16	19051950
prego	107	M0	2019-05-16	19051969
prego	108	M0	2019-05-16	19051981
prego	109	M0	2019-05-17	19052159
prego	110	M0	2019-05-17	19052198
prego	111	M0	2019-05-17	19052206
prego	112	M0	2019-05-17	19052230
prego	113	M0	2019-05-17	19052239
prego	114	M0	2019-05-17	19052248
prego	115	M0	2019-05-17	19052290
prego	82	M3	2019-07-19	19072404
prego	163	M0	2019-07-19	19072408
prego	164	M0	2019-07-19	19072422
prego	165	M0	2019-07-19	19072431
prego	166	M0	2019-07-19	19072445
prego	81	M3	2019-07-19	19072468
prego	167	M0	2019-07-19	19072474
prego	168	M0	2019-07-19	19072494
prego	169	M0	2019-07-22	19072602
prego	70	M3	2019-07-24	19072978
prego	66	M3	2019-07-25	19073010
prego	170	M0	2019-08-05	19080354
prego	7	M3	2019-08-05	19080390
prego	171	M0	2019-08-05	19080400
prego	6	M3	2019-08-07	19080771
prego	116	M0	2019-05-23	19052904
prego	117	M0	2019-05-23	19052916
prego	118	M0	2019-05-23	19052960
prego	119	M0	2019-05-23	19052983
prego	120	M0	2019-05-24	19053126
prego	121	M0	2019-05-24	19053134
prego	99	M3	2019-08-09	19081091
prego	97	M3	2019-08-09	19081097
prego	44	M0	2019-05-29	19053737
prego	45	M0	2019-05-29	19053753
prego	173	M0	2019-08-09	19081179
prego	42	M3	2019-08-14	19081751
prego	174	M0	2019-08-14	19081767
prego	35	M6	2019-09-30	19093835
prego	25	M3	2019-10-02	19100298
prego	3	M3	2019-08-14	19081782
prego	175	M0	2019-08-14	19081792
prego	108	M3	2019-08-16	19081851
prego	96	M3	2019-08-16	19081856
prego	94	M3	2019-08-16	19081877
prego	129	M0	2019-06-07	19060766
prego	111	M3	2019-08-16	19081945
prego	176	M0	2019-08-16	19081980
prego	131	M0	2019-06-13	19061255
prego	132	M0	2019-06-13	19061265
prego	133	M0	2019-06-14	19061398
prego	134	M0	2019-06-14	19061407
prego	135	M0	2019-06-14	19061450
prego	136	M0	2019-06-14	19061499
prego	137	M0	2019-06-14	19061520
prego	225	M0	2019-10-07	19100838
prego	176	M3	2019-11-22	19112438
prego	37	M6	2019-10-09	19101171
prego	31	M3	2019-10-09	19101187
prego	30	M3	2019-10-09	19101208
prego	226	M0	2019-10-10	19101295
prego	183	M0	2019-08-22	19082718
prego	182	M0	2019-08-22	19082745
prego	139	M0	2019-06-20	19062151
prego	140	M0	2019-06-20	19062169
prego	141	M0	2019-06-21	19062311
prego	142	M0	2019-06-21	19062333
prego	143	M0	2019-06-21	19062351
prego	24	M0	2019-06-24	19062555
prego	109	M3	2019-08-23	19082891
prego	26	M3	2019-10-16	19102095
prego	27	M3	2019-10-16	19102099
prego	78	M6	2019-10-17	19102138
prego	140	M3	2019-10-17	19102165
prego	43	M3	2019-08-26	19083079
prego	17	M3	2019-08-26	19083092
prego	13	M3	2019-08-26	19083099
prego	9	M3	2019-08-26	19083111
prego	188	M0	2019-08-26	19083119
prego	16	M3	2019-08-26	19083143
prego	189	M0	2019-08-29	19083652
prego	103	M3	2019-08-29	19083661
prego	112	M3	2019-08-29	19083674
prego	149	M0	2019-06-28	19063187
prego	150	M0	2019-06-28	19063287
prego	190	M0	2019-08-29	19083740
prego	100	M3	2019-08-30	19083846
prego	102	M3	2019-08-30	19083851
prego	113	M3	2019-08-30	19083893
prego	191	M0	2019-08-30	19083911
prego	193	M0	2019-08-30	19083931
prego	192	M0	2019-08-30	19083944
prego	115	M3	2019-08-30	19083965
prego	14	M3	2019-09-02	19090003
prego	194	M0	2019-09-02	19090098
prego	195	M0	2019-09-02	19090101
prego	196	M0	2019-09-04	19090530
prego	126	M3	2019-09-05	19090561
prego	167	M3	2019-10-25	19103295
prego	119	M3	2019-09-05	19090573
prego	197	M0	2019-09-05	19090589
prego	198	M0	2019-09-06	19090763
prego	127	M3	2019-09-06	19090776
prego	199	M0	2019-09-06	19090799
prego	46	M3	2019-09-09	19090969
prego	15	M3	2019-09-09	19090979
prego	35	M3	2019-07-08	19070902
prego	123	M3	2019-09-09	19091024
prego	47	M3	2019-09-11	19091458
prego	32	M3	2019-10-30	19103842
prego	36	M3	2019-07-08	19070919
prego	37	M3	2019-07-10	19071322
prego	33	M3	2019-07-10	19071335
prego	34	M3	2019-07-10	19071358
prego	31	M0	2019-07-10	19071362
prego	124	M3	2019-09-12	19091586
prego	203	M0	2019-09-12	19091593
prego	160	M0	2019-07-12	19071570
prego	121	M3	2019-09-13	19091751
prego	128	M3	2019-09-13	19091764
prego	45	M3	2019-09-13	19091819
prego	74	M3	2019-07-12	19071629
prego	4	M3	2019-07-12	19071632
prego	76	M3	2019-07-12	19071661
prego	67	M3	2019-07-17	19072121
prego	85	M3	2019-07-17	19072155
prego	20	M3	2019-09-18	19092410
prego	161	M0	2019-07-17	19072170
prego	80	M3	2019-07-18	19072211
prego	78	M3	2019-07-18	19072255
prego	162	M0	2019-07-19	19072391
prego	163	M3	2019-11-08	19110661
prego	205	M0	2019-09-19	19092485
prego	133	M3	2019-09-20	19092679
prego	134	M3	2019-09-20	19092691
prego	135	M3	2019-09-20	19092697
prego	207	M0	2019-09-20	19092722
prego	206	M0	2019-09-20	19092726
prego	208	M0	2019-09-20	19092745
prego	129	M3	2019-09-20	19092766
prego	210	M0	2019-09-20	19092821
prego	209	M0	2019-09-20	19092826
prego	211	M0	2019-09-20	19092841
prego	23	M3	2019-09-23	19092899
prego	22	M3	2019-09-23	19092941
prego	212	M0	2019-09-25	19093256
prego	10	M3	2019-08-07	19080835
prego	172	M0	2019-08-08	19080879
prego	88	M3	2019-08-08	19080913
prego	92	M3	2019-08-08	19080928
prego	87	M3	2019-08-08	19080934
prego	93	M3	2019-08-09	19081069
prego	131	M3	2019-09-27	19093627
prego	132	M3	2019-09-27	19093643
prego	86	M3	2019-08-09	19081110
prego	104	M3	2019-08-09	19081159
prego	143	M3	2019-09-27	19093747
prego	216	M0	2019-09-27	19093776
prego	157	M3	2019-09-27	19093785
prego	212	M3	2019-12-23	19122777
prego	118	M6	2019-11-15	19111453
prego	217	M0	2019-10-02	19100308
prego	218	M0	2019-10-02	19100318
prego	38	M6	2019-10-02	19100325
prego	144	M3	2019-10-03	19100364
prego	220	M0	2019-10-03	19100411
prego	118	M3	2019-08-16	19081894
prego	151	M3	2019-10-03	19100418
prego	221	M0	2019-10-04	19100657
prego	177	M0	2019-08-19	19082072
prego	178	M0	2019-08-19	19082076
prego	40	M3	2019-08-19	19082081
prego	179	M0	2019-08-19	19082141
prego	12	M3	2019-08-21	19082600
prego	223	M0	2019-10-07	19100827
prego	24	M3	2019-10-07	19100831
prego	96	M6	2019-11-22	19112406
prego	25	M6	2020-01-08	20010793
prego	178	M3	2019-11-25	19112482
prego	40	M6	2019-11-25	19112485
prego	43	M6	2019-11-25	19112492
prego	177	M3	2019-11-25	19112498
prego	73	M6	2019-10-10	19101303
prego	74	M6	2019-10-11	19101445
prego	184	M0	2019-08-22	19082756
prego	117	M3	2019-08-22	19082767
prego	105	M3	2019-08-22	19082770
prego	107	M3	2019-08-23	19082851
prego	185	M0	2019-08-23	19082858
prego	91	M3	2019-08-23	19082876
prego	58	M0	2019-10-16	19102075
prego	112	M6	2019-11-28	19113028
prego	287	M0	2020-01-13	20011295
prego	217	M3	2020-01-15	20011699
prego	288	M0	2020-01-15	20011743
prego	80	M6	2019-10-17	19102176
prego	79	M6	2019-10-18	19102311
prego	82	M6	2019-10-18	19102316
prego	75	M6	2019-10-18	19102344
prego	148	M3	2019-10-18	19102351
prego	227	M0	2019-10-18	19102420
prego	153	M3	2019-10-18	19102443
prego	149	M3	2019-10-18	19102446
prego	50	M3	2019-10-21	19102529
prego	106	M3	2019-08-29	19083690
prego	114	M3	2019-08-29	19083702
prego	155	M3	2019-10-23	19102999
prego	156	M3	2019-10-24	19103013
prego	154	M3	2019-10-24	19103025
prego	229	M0	2019-10-24	19103039
prego	230	M0	2019-10-24	19103044
prego	139	M3	2019-10-24	19103053
prego	231	M0	2019-10-24	19103065
prego	85	M6	2019-10-24	19103079
prego	81	M6	2019-10-25	19103193
prego	232	M0	2019-10-25	19103202
prego	233	M0	2019-10-25	19103231
prego	137	M3	2019-10-25	19103245
prego	234	M0	2019-10-25	19103278
prego	262	M0	2019-12-06	19120779
prego	7	M6	2019-10-28	19103412
prego	49	M3	2019-10-28	19103426
prego	28	M3	2019-10-28	19103430
prego	10	M6	2019-10-28	19103435
prego	263	M0	2019-12-09	19120864
prego	170	M3	2019-12-09	19120879
prego	91	M6	2019-12-09	19120889
prego	200	M0	2019-09-09	19091016
prego	235	M0	2019-10-28	19103475
prego	161	M3	2019-10-30	19103836
prego	3	M6	2019-12-11	19121373
prego	236	M0	2019-10-30	19103859
prego	29	M3	2019-10-30	19103882
prego	201	M0	2019-09-11	19091488
prego	11	M3	2019-09-11	19091499
prego	202	M0	2019-09-12	19091568
prego	6	M6	2019-11-04	19110029
prego	166	M3	2019-11-04	19110045
prego	125	M3	2019-09-12	19091612
prego	237	M0	2019-11-04	19110071
prego	267	M0	2019-12-13	19121637
prego	127	M6	2019-12-13	19121685
prego	136	M3	2019-09-13	19091896
prego	268	M0	2019-12-13	19121731
prego	108	M6	2019-11-07	19110463
prego	204	M0	2019-09-16	19091981
prego	19	M3	2019-09-16	19092024
prego	162	M3	2019-11-08	19110624
prego	99	M6	2019-11-08	19110634
prego	88	M6	2019-11-08	19110644
prego	238	M0	2019-11-08	19110649
prego	239	M0	2019-11-08	19110652
prego	22	M6	2019-12-16	19121862
prego	92	M6	2019-11-08	19110690
prego	104	M6	2019-11-08	19110730
prego	168	M3	2019-11-08	19110741
prego	164	M3	2019-11-08	19110773
prego	240	M0	2019-11-08	19110782
prego	67	M6	2019-11-13	19111057
prego	165	M3	2019-11-13	19111073
prego	70	M6	2019-11-13	19111088
prego	241	M0	2019-11-13	19111092
prego	66	M6	2019-11-14	19111141
prego	242	M0	2019-11-14	19111148
prego	182	M3	2019-11-14	19111173
prego	183	M3	2019-11-14	19111178
prego	184	M3	2019-11-14	19111181
prego	21	M3	2019-09-25	19093377
prego	213	M0	2019-09-25	19093388
prego	48	M3	2019-09-25	19093405
prego	145	M3	2019-09-26	19093468
prego	138	M3	2019-09-26	19093480
prego	214	M0	2019-09-26	19093496
prego	56	M3	2019-12-23	19122682
prego	204	M3	2019-12-23	19122691
prego	215	M0	2019-09-27	19093663
prego	122	M3	2019-09-27	19093731
prego	200	M3	2019-12-23	19122721
prego	97	M6	2019-11-15	19111429
prego	279	M0	2019-12-23	19122767
prego	168	M6	2020-02-21	20022568
prego	280	M0	2020-01-02	20010013
prego	244	M0	2019-11-15	19111479
prego	173	M3	2019-11-15	19111482
prego	245	M0	2019-11-15	19111546
prego	9	M6	2019-11-18	19111582
prego	246	M0	2019-11-18	19111595
prego	219	M0	2019-10-03	19100415
prego	42	M6	2019-11-20	19112039
prego	248	M0	2019-11-20	19112060
prego	152	M3	2019-10-04	19100685
prego	69	M6	2019-10-04	19100687
prego	146	M3	2019-10-04	19100690
prego	222	M0	2019-10-04	19100709
prego	36	M6	2019-10-07	19100775
prego	109	M6	2019-11-22	19112310
prego	114	M6	2019-11-22	19112331
prego	21	M6	2020-01-08	20010783
prego	255	M3	2020-02-27	20023177
prego	30	M6	2020-01-08	20010811
prego	31	M6	2020-01-08	20010814
prego	222	M3	2020-01-10	20011039
prego	285	M0	2020-01-10	20011055
prego	251	M0	2019-11-25	19112520
prego	252	M0	2019-11-25	19112524
prego	77	M6	2019-10-11	19101479
prego	76	M6	2019-10-11	19101508
prego	147	M3	2019-10-11	19101588
prego	4	M6	2019-10-14	19101641
prego	142	M3	2019-10-14	19101650
prego	51	M3	2019-10-16	19102057
prego	255	M0	2019-11-28	19113003
prego	15	M6	2020-01-13	20011273
prego	332	M0	2020-03-04	20030448
prego	63	M3	2020-03-05	20030468
prego	333	M0	2020-03-05	20030504
prego	289	M0	2020-01-15	20011772
prego	290	M0	2020-01-16	20011860
prego	291	M0	2020-01-17	20011990
prego	292	M0	2020-01-17	20012028
prego	293	M0	2020-01-17	20012046
prego	152	M6	2020-01-17	20012095
prego	190	M3	2019-11-28	19113070
prego	172	M3	2019-11-29	19113183
prego	256	M0	2019-11-29	19113195
prego	160	M3	2019-10-21	19102573
prego	228	M0	2019-10-23	19102948
prego	53	M3	2019-11-29	19113240
prego	120	M6	2019-11-29	19113277
prego	121	M6	2019-11-29	19113291
prego	258	M0	2019-11-29	19113309
prego	187	M3	2019-11-29	19113312
prego	13	M6	2019-12-02	19120013
prego	259	M0	2019-12-02	19120045
prego	47	M6	2019-12-04	19120422
prego	52	M3	2019-12-04	19120445
prego	174	M3	2019-12-04	19120476
prego	126	M6	2019-12-05	19120495
prego	260	M0	2019-12-05	19120506
prego	261	M0	2019-12-06	19120744
prego	224	M3	2020-01-27	20013179
prego	189	M3	2019-12-06	19120786
prego	193	M3	2019-12-06	19120802
prego	192	M3	2019-12-06	19120805
prego	46	M6	2019-12-09	19120853
prego	302	M0	2020-01-29	20013640
prego	303	M0	2020-01-30	20013668
prego	304	M0	2020-01-30	20013695
prego	264	M0	2019-12-09	19120922
prego	265	M0	2019-12-09	19120937
prego	11	M6	2019-12-11	19121351
prego	306	M0	2020-01-31	20013903
prego	196	M3	2019-12-11	19121386
prego	181	M3	2019-12-12	19121403
prego	33	M6	2019-10-30	19103883
prego	87	M6	2019-10-30	19103912
prego	34	M6	2019-11-04	19110018
prego	198	M3	2019-12-12	19121437
prego	266	M0	2019-12-12	19121464
prego	169	M3	2019-11-04	19110055
prego	191	M3	2019-12-13	19121609
prego	27	M6	2020-02-05	20020508
prego	182	M6	2020-02-06	20020583
prego	123	M6	2019-12-13	19121704
prego	184	M6	2020-02-06	20020591
prego	136	M6	2019-12-13	19121739
prego	171	M3	2019-11-07	19110495
prego	159	M3	2019-11-07	19110517
prego	19	M6	2019-12-16	19121808
prego	54	M3	2019-12-16	19121813
prego	271	M0	2019-12-16	19121818
prego	272	M0	2019-12-16	19121833
prego	57	M3	2019-12-16	19121853
prego	156	M6	2020-02-13	20021410
prego	273	M0	2019-12-18	19122241
prego	274	M0	2019-12-18	19122266
prego	275	M0	2019-12-18	19122269
prego	48	M6	2019-12-18	19122281
prego	23	M6	2019-12-18	19122286
prego	188	M3	2019-12-18	19122305
prego	276	M0	2019-12-19	19122344
prego	203	M3	2019-12-19	19122357
prego	125	M6	2019-12-19	19122362
prego	100	M6	2019-12-19	19122371
prego	119	M6	2019-12-20	19122487
prego	197	M3	2019-12-20	19122494
prego	202	M3	2019-12-20	19122511
prego	205	M3	2019-12-20	19122516
prego	90	M6	2019-11-14	19111186
prego	98	M6	2019-11-14	19111202
prego	101	M6	2019-11-14	19111218
prego	94	M6	2019-11-15	19111383
prego	243	M0	2019-11-15	19111415
prego	215	M3	2019-12-20	19122631
prego	242	M3	2020-02-20	20022269
prego	318	M0	2020-02-20	20022278
prego	20	M6	2019-12-23	19122704
prego	277	M0	2019-12-23	19122709
prego	321	M0	2020-02-21	20022480
prego	278	M0	2019-12-23	19122742
prego	173	M6	2020-02-21	20022565
prego	335	M0	2020-03-05	20030558
prego	171	M6	2020-02-21	20022578
prego	282	M0	2020-01-02	20010071
prego	281	M0	2020-01-02	20010074
prego	133	M6	2020-01-03	20010139
prego	134	M6	2020-01-03	20010146
prego	146	M6	2020-01-03	20010154
prego	247	M0	2019-11-18	19111654
prego	283	M0	2020-01-03	20010192
prego	144	M6	2020-01-06	20010330
prego	117	M6	2019-11-21	19112124
prego	249	M0	2019-11-21	19112171
prego	103	M6	2019-11-22	19112287
prego	102	M6	2019-11-22	19112290
prego	250	M0	2019-11-22	19112303
prego	220	M3	2020-01-06	20010406
prego	201	M3	2020-01-08	20010768
prego	327	M0	2020-02-27	20023138
prego	225	M3	2020-01-27	20013173
prego	190	M6	2020-02-27	20023193
prego	162	M6	2020-02-28	20023298
prego	328	M0	2020-02-28	20023321
prego	329	M0	2020-02-28	20023357
prego	151	M6	2020-01-10	20011072
prego	218	M3	2020-01-10	20011076
prego	17	M6	2019-11-25	19112530
prego	12	M6	2019-11-27	19112927
prego	253	M0	2019-11-27	19112938
prego	175	M3	2019-11-27	19112952
prego	254	M0	2019-11-27	19112964
prego	106	M6	2019-11-28	19112994
prego	145	M6	2020-01-13	20011244
prego	251	M3	2020-03-02	20030073
prego	307	M0	2020-01-31	20013999
prego	116	M6	2019-12-12	19121407
prego	124	M6	2019-12-12	19121417
prego	64	M3	2020-03-05	20030523
prego	334	M0	2020-03-05	20030540
prego	177	M6	2020-03-05	20030545
prego	159	M6	2020-03-05	20030551
prego	308	M0	2020-02-05	20020499
prego	185	M6	2020-03-06	20030670
prego	209	M3	2020-01-17	20012126
prego	210	M3	2020-01-17	20012128
prego	294	M0	2020-01-20	20012180
prego	111	M6	2019-11-29	19113201
prego	257	M0	2019-11-29	19113215
prego	45	M6	2020-01-20	20012275
prego	223	M3	2020-01-23	20012774
prego	231	M3	2020-01-23	20012796
prego	226	M3	2020-01-24	20012935
prego	233	M3	2020-01-24	20012957
prego	297	M0	2020-01-24	20012966
prego	298	M0	2020-01-24	20012977
prego	299	M0	2020-01-24	20012990
prego	227	M3	2020-01-24	20013019
prego	221	M3	2020-01-24	20013045
prego	139	M6	2020-01-27	20013135
prego	244	M3	2020-02-14	20021608
prego	51	M6	2020-01-27	20013176
prego	260	M3	2020-03-13	20031582
prego	228	M3	2020-01-29	20013584
prego	300	M0	2020-01-29	20013600
prego	58	M3	2020-01-29	20013613
prego	301	M0	2020-01-29	20013635
prego	342	M0	2020-03-13	20031697
prego	212	M6	2020-03-13	20031710
prego	267	M3	2020-03-13	20031712
prego	305	M0	2020-01-30	20013711
prego	129	M6	2020-01-30	20013719
prego	167	M6	2020-01-31	20013895
prego	252	M3	2020-03-16	20031874
prego	230	M3	2020-01-31	20013980
prego	60	M3	2020-02-19	20022227
prego	57	M6	2020-05-04	20050093
prego	147	M6	2020-01-31	20014007
prego	199	M3	2019-12-12	19121434
prego	232	M3	2020-02-03	20020034
prego	240	M3	2020-02-05	20020457
prego	185	M3	2019-12-13	19121565
prego	235	M3	2020-02-05	20020469
prego	60	M6	2020-06-15	20061515
prego	62	M6	2020-06-15	20061606
prego	183	M6	2020-02-06	20020588
prego	309	M0	2020-02-06	20020598
prego	269	M0	2019-12-13	19121758
prego	270	M0	2019-12-13	19121770
prego	234	M3	2020-02-07	20020834
prego	50	M6	2020-02-10	20020906
prego	59	M3	2020-02-10	20020939
prego	154	M6	2020-02-13	20021404
prego	310	M0	2020-02-13	20021407
prego	311	M0	2020-02-13	20021423
prego	312	M0	2020-02-13	20021462
prego	26	M6	2020-02-13	20021464
prego	160	M6	2020-02-13	20021477
prego	175	M6	2020-03-11	20031334
prego	238	M3	2020-02-14	20021614
prego	239	M3	2020-02-14	20021618
prego	313	M0	2020-02-14	20021638
prego	137	M6	2020-02-14	20021649
prego	314	M0	2020-02-14	20021685
prego	155	M6	2020-02-14	20021747
prego	315	M0	2020-02-17	20021826
prego	316	M0	2020-02-17	20021834
prego	166	M6	2020-02-17	20021838
prego	208	M3	2019-12-20	19122537
prego	207	M3	2019-12-20	19122544
prego	206	M3	2019-12-20	19122545
prego	180	M3	2019-12-20	19122595
prego	86	M6	2019-12-20	19122604
prego	58	M6	2020-05-04	20050080
prego	319	M0	2020-02-20	20022338
prego	320	M0	2020-02-21	20022469
prego	59	M6	2020-05-25	20051920
prego	243	M3	2020-02-21	20022508
prego	64	M6	2020-06-15	20061481
prego	322	M0	2020-02-21	20022586
prego	254	M3	2020-02-21	20022590
prego	323	M0	2020-02-21	20022606
prego	164	M6	2020-02-21	20022622
prego	28	M6	2020-02-24	20022668
prego	143	M6	2020-01-03	20010177
prego	324	M0	2020-02-24	20022690
prego	325	M0	2020-02-24	20022718
prego	138	M6	2020-01-06	20010354
prego	213	M3	2020-01-06	20010364
prego	284	M0	2020-01-06	20010383
prego	24	M6	2020-01-06	20010389
prego	219	M3	2020-01-06	20010403
prego	161	M6	2020-02-26	20023112
prego	326	M0	2020-02-26	20023127
prego	340	M0	2020-03-12	20031436
prego	341	M0	2020-03-12	20031509
prego	274	M3	2020-03-13	20031598
prego	275	M3	2020-03-13	20031602
prego	258	M3	2020-02-28	20023376
prego	245	M3	2020-02-28	20023396
prego	286	M0	2020-01-10	20011106
prego	214	M3	2020-01-10	20011120
prego	211	M3	2020-01-10	20011181
prego	122	M6	2020-01-10	20011192
prego	216	M3	2020-01-10	20011197
prego	128	M6	2020-01-10	20011200
prego	331	M0	2020-03-02	20030056
prego	241	M3	2020-02-19	20022221
prego	296	M0	2020-01-20	20012246
prego	189	M6	2020-03-06	20030805
prego	140	M6	2020-02-03	20020012
prego	148	M6	2020-02-03	20020031
prego	61	M6	2020-05-25	20051910
prego	54	M6	2020-05-25	20051939
prego	192	M6	2020-03-09	20030927
prego	63	M6	2020-06-15	20061472
prego	256	M3	2020-03-06	20030680
prego	250	M3	2020-03-06	20030685
prego	163	M6	2020-03-06	20030696
prego	295	M0	2020-01-20	20012215
prego	263	M3	2020-03-09	20030881
prego	264	M3	2020-03-09	20030886
prego	259	M3	2020-03-09	20030912
prego	193	M6	2020-03-09	20030923
prego	337	M0	2020-03-11	20031184
prego	338	M0	2020-03-11	20031221
prego	53	M6	2020-03-11	20031296
prego	339	M0	2020-03-11	20031328
prego	142	M6	2020-02-07	20020731
prego	176	M6	2020-03-13	20031678
prego	187	M6	2020-03-13	20031682
prego	343	M0	2020-03-13	20031721
prego	271	M3	2020-03-16	20031793
prego	261	M3	2020-03-16	20031822
prego	149	M6	2020-02-07	20020810
prego	52	M6	2020-05-05	20050210
prego	56	M6	2020-05-18	20051326
prego	29	M6	2020-02-26	20023092
prego	317	M0	2020-02-17	20021871
prego	236	M3	2020-02-19	20022201
prego	253	M3	2020-02-28	20023411
prego	246	M3	2020-03-02	20030028
prego	169	M6	2020-03-02	20030049
prego	336	M0	2020-03-06	20030738
prego	257	M3	2020-03-06	20030790
prego	65	M3	2019-07-11
prego	247	M3	2020-02-24	20022733
prego	330	M0	2020-02-28	20023430
prego	61	M3	2020-02-17	20021849
prego	237	M3	2020-02-17	20021852
prego	178	M6	2020-03-02	20030019
prego	249	M3	2020-02-24	20022721
prego	49	M6	2020-02-24	20022675
prego	32	M6	2020-02-26	20023109
prego	165	M6	2020-02-26	20023097
prego	62	M3	2020-03-02	20030006
							N.mucosa/macacae group
Prego						19041762/2	Neisseria mucosa/macacae		3	0.03	0.02	2019	Pharynx	-		-		-	-	-	-	-	-
Prego						19051904/1	Neisseria mucosa/macacae		2	0.05	0.25	2019	Pharynx	-		-	-	-	-	-	-	-	-	-	-	-	-	-	-	-	-	-	-	-	-	-	-
Prego						19052394/2	Neisseria mucosa/macacae		4	0.03	0.01	2019	Pharynx	-		-	-	-	-	-	-	-	-	-	-	-	-	-	-	-	-	-	-	-	-	-	-
Prego						19062968/1	Neisseria mucosa/macacae		16	0.06	6	2019	Pharynx	-		-	-	-	-	-	-	-	-	-	-	-	-	-	-	-	-	-	-	-	-	-	-
Prego						19081774/2	Neisseria mucosa/macacae		24	0.09	0.02	2019	Pharynx	-		-	-	-	-	-	-	-	-	-	-	-	-	-	-	-	-	-	-	-	-	-	-
Prego						19111422/4	Neisseria mucosa/macacae		1.5	0.03	0.02	2019	Pharynx	-		-	-	-	-	-	-	-	-	-	-	-	-	-	-	-	-	-	-	-	-	-	-
Prego						19111422/7	Neisseria mucosa/macacae		1	0.03	0.02	2019	Pharynx	NT	NT	NT	NT	NT	NT	NT	NT	NT	NT	NT	NT	NT	NT	NT	NT	NT	NT	NT	NT	NT	NT	NT	NT
Comcom						Co000770/5	Neisseria mucosa/macacae		3	0.05	0.02	2020	Pharynx	-		-	-	-	-	-	-	-	-	-	-	-	-	-	-	-	-	-	-	-	-	-	-
Comcom						Co000771/4	Neisseria mucosa/macacae		6	0.06	0.02	2020	Pharynx	-		-	-	-	-	-	-	-	-	-	-	-	-	-	-	-	-	-	-	-	-	-	-
Comcom						Co000772/3	Neisseria mucosa/macacae		4	0.03	0.01	2020	Pharynx	-		-	-	-	-	-	-	-	-	-	-	-	-	-	-	-	-	-	-	-	-	-	-
Comcom						Co000773/3	Neisseria mucosa/macacae		2	0.03	0.01	2020	Pharynx	-		-	-	-	-	-	-	-	-	-	-	-	-	-	-	-	-	-	-	-	-	-	-
Comcom						Co000779/1	Neisseria mucosa/macacae		2	0.13	0.03	2020	Pharynx	-		-	-	-	-	-	-	-	-	-	-	-	-	-	-	-	-	-	-	-	-	-	-
Comcom						Co000783/3	Neisseria mucosa/macacae		6	0.03	0.01	2020	Pharynx	-		-	-	-	-	-	-	-	-	-	-	-	-	-	-	-	-	-	-	-	-	-	-
comcom						Co000783/6	Neisseria mucosa/macacae		32	0.03	0.02	2020	Pharynx	NT	NT	NT	NT	NT	NT	NT	NT	NT	NT	NT	NT	NT	NT	NT	NT	NT	NT	NT	NT	NT	NT	NT	NT
Comcom						Co000787/3	Neisseria mucosa/macacae		4	0.09	0.06	2020	Pharynx	-		-	-	-	-	-	-	-	-	-	-	-	-	-	-	-	-	-	-	-	-	-	-
Comcom						Co000788/1	Neisseria mucosa/macacae		2	0.03	0.01	2020	Pharynx	-		-	-	-	-	-	-	-	-	-	-	-	-	-	-	-	-	-	-	-	-	-	-
comcom						Co000788/4	Neisseria mucosa/macacae		4	0.03	0.01	2020	Pharynx	NT	NT	NT	NT	NT	NT	NT	NT	NT	NT	NT	NT	NT	NT	NT	NT	NT	NT	NT	NT	NT	NT	NT	NT
Reference Collection						ITM 1621	Neisseria mucosa (ITM 1621)					1977	vaginal	-		-	-	-	-	-	-	-	-	-	-	-	-	-	-	-	-	-	-	-	-	-	-
Reference Collection						ATCC 19696	Neisseria mucosa (ITM 2252)		NA	NA	NA	NA	NA	-		-	-	-	-	-	-	-	-	-	-	-	-	-	-	-	-	-	-	-	-	-	-
Reference Collection						ATCC 19697	Neisseria mucosa (ITM 3369)		NA	NA	NA	NA	NA	-		-	-	-	-	-	-	-	-	-	-	-	-	-	-	-	-	-	-	-	-	-	-
Reference Collection						ATCC 19695	Neisseria mucosa (ITM 3375)		NA	NA	NA	NA	NA	-		-	-	-	-	-	-	-	-	-	-	-	-	-	-	-	-	-	-	-	-	-	-
Reference Collection						ATCC 19694	Neisseria mucosa (ITM 3380)		NA	NA	NA	NA	NA	-		-	-	-	-	-	-	-	-	-	-	-	-	-	-	-	-	-	-	-	-	-	-
Reference Collection						ATCC 25999	Neisseria mucosa (ITM 3391)		NA	NA	NA	NA	Pharynx			-		-	-	-	-	-	-
Reference Collection						ATCC 25996	Neisseria mucosa (DSM4631)		NA	NA	NA	NA	NA	-		-	-	-	-					-	-	-	-	-	-	-	-	-	-	-	-	-	-
							Other isolates
Reference Collection						ATCC 29213	Staphylococcus aureus		NA	NA	NA	NA	NA	-		-	-	-						-														-	-	-	-
Reference Collection						ATCC 25923	Staphylococcus aureus		NA	NA	NA	NA	NA	-		-	-	-						-														-	-	-	-
Reference Collection						ATCC 49619	Streptococcus pneumoniae		NA	NA	NA	NA	NA	25		22	22	19						21														21	21	19	21
Reference Collection						ATCC 25922	Escherichia coli		NA	NA	NA	NA	NA	13		-	-	-						-														(11)	(11)	-	-
Reference Collection						LMG 14238	Streptococcus pyogenes		NA	NA	NA	NA	NA	-		-	-	-						-														-	-	-	-
Reference Collection						LMG 9479	Lactobacillus crispatus		NA	NA	NA	NA	NA	-		-	-	-						-														-	-	-	-
NA: Not available

## Sheet: Sheet1
		1	2	3	4	5	6	7	8	9	10	11	12	13	14	15	16	17	18	19	20	21	22	23	24	25	26	27	28
